# Supplementary material for: Copper(ii)-based metal–organic framework delivery of calcium ascorbate for enhanced chemodynamic therapy via H2O2 self-supply and glutathione depletion
Source: Royal Society of Chemistry journal article supplement (doi:10.1039/d3bm01922e), 2024-01-01
Supplement: d3bm01922e1.pdf [file d3bm01922e1.pdf]

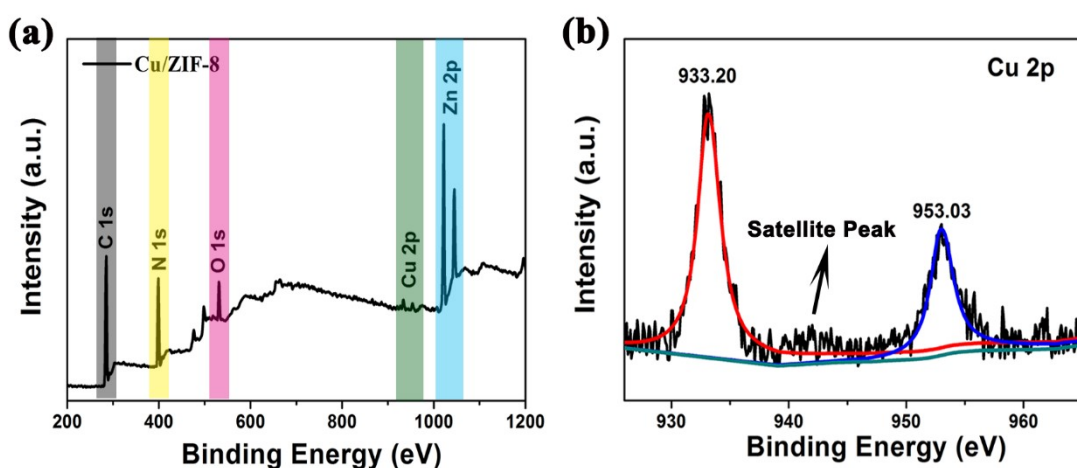

**Fig. S1** (a) XPS survey spectrum of Cu/ZIF-8. (b) The high-resolution Cu(2p) XPS spectrum of Cu/ZIF-8.

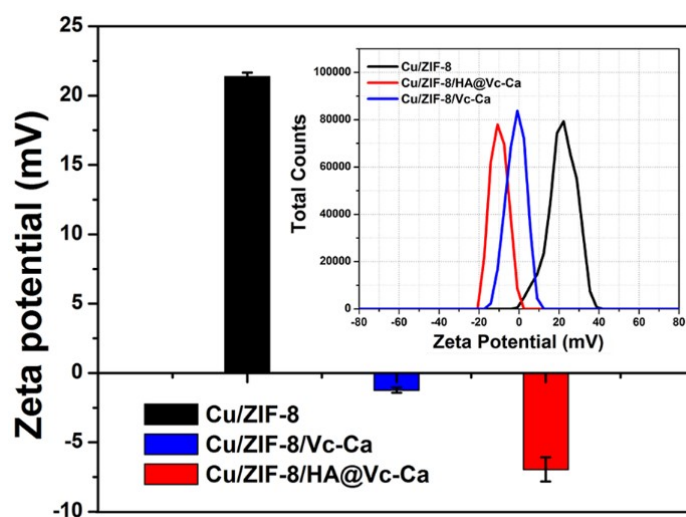

**Fig. S2** Zeta potentials of Cu/ZIF-8, Cu/ZIF-8/HA, Cu/ZIF-8/Vc-Ca, and Cu/ZIF-8/HA@Vc-Ca.

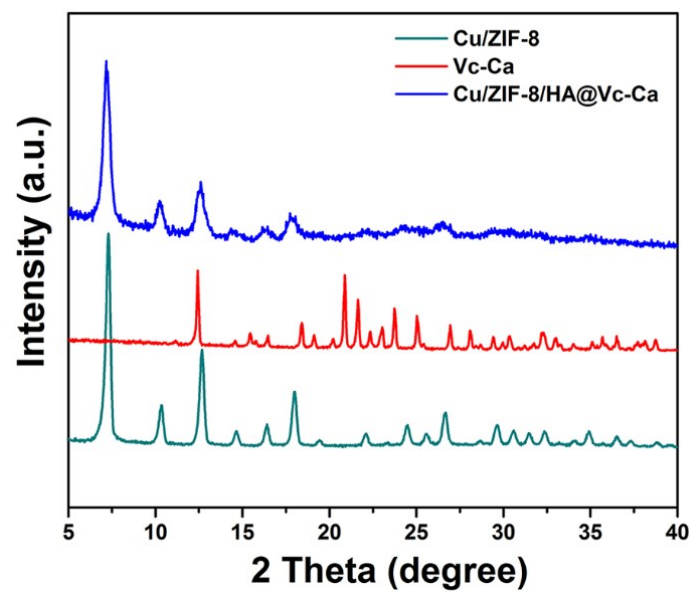

**Fig. S3** XRD patterns of the simulated Cu/ZIF-8, Vc-Ca, and Cu/ZIF-8/HA@ Vc-Ca.

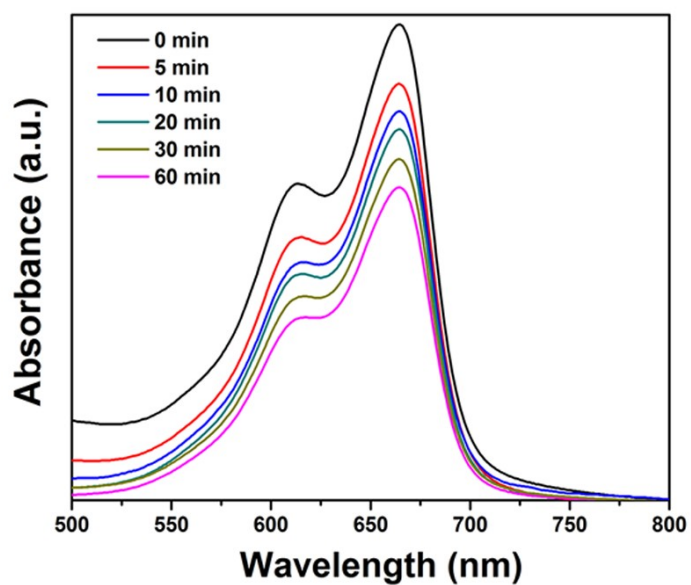

**Fig. S4** The MB degradation carried out with Cu/ZIF-8/HA@Vc-Ca at different times.

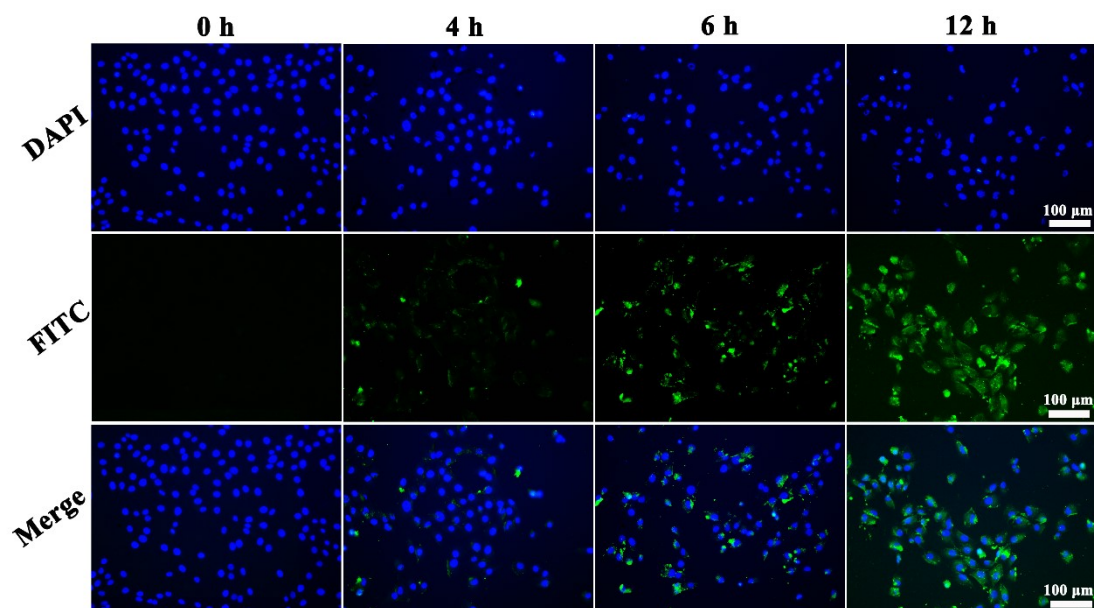

**Fig. S5** Fluorescence microscopy images of MG63 cells cultured with FITC-labeled Cu/ZIF-8/HA@Vc-Ca for 0 h, 4 h, 6 h, and 12 h. Green fluorescence represents the FITC dye and blue fluorescence represents the nucleus.

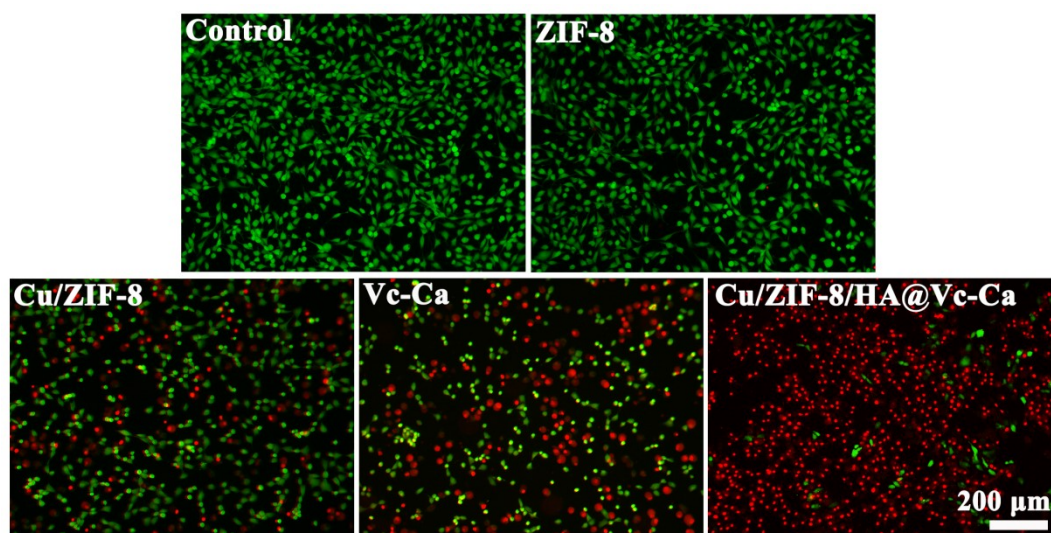

**Fig. S6** Live/dead stain images of MG63 cells after various treatments. Live and dead cells were stained with Calcein-AM (green) and EthD-I (red), respectively.
